# Supplementary material
Source: publisher figshare collection journal article supplement (https://frontiersin.figshare.com/ndownloader/files/12301952)
Supplement: Supplementary file [file 12301952]

1 **Table S1: Annotated genomes utilised to facilitate an *in silico* screen for sulphite reducing genes**

| Species                                | Strain               | GC %  | Size Mb |
|----------------------------------------|----------------------|-------|---------|
| <i>Bacillus cereus</i>                 | ATCC 14579           | 35.3  | 5.42    |
| <i>Bacillus licheniformis</i>          | DSM 13               | 46.2  | 4.22    |
| <i>Clostridium acetireducens</i>       | DSM 10703            | 26.7  | 2.4     |
| <i>Clostridium algidcarnis</i>         | B3                   | 3.06  | 30.3    |
| <i>Clostridium beijerickii</i>         | ATCC 35702           | 30    | 6.49    |
| <i>Clostridium botulinum</i>           | B str Eklund         | 27.47 | 3.8     |
| <i>Clostridium botulinum</i>           | ATCC 3502            | 28.19 | 3.9     |
| <i>Clostridium botulinum</i>           | D str 16868          | 28.17 | 3.08    |
| <i>Clostridium botulinum</i>           | E1 str BoNT E Beluga | 27    | 3.99    |
| <i>Clostridium botulinum</i>           | F str Langeland      | 28.29 | 4.01    |
| <i>Clostridium butyricum</i>           | DSM 10702            | 28.5  | 4.59    |
| <i>Clostridium butyricum</i>           | KNU L09              | 32    | 3.82    |
| <i>Clostridium celerecens</i>          | AAU1                 | 27.9  | 3.98    |
| <i>Clostridium celluovorans</i>        | 743B                 | 31.2  | 5.26    |
| <i>Clostridium intestinale</i>         | DSM 6191             | 30.1  | 4.6     |
| <i>Clostridium kluyveri</i>            | DSM 555              | 32.02 | 4.02    |
| <i>Clostridium magnum</i>              | DSM 2767             | 32.1  | 6.63    |
| <i>Clostridium noyvi</i>               | ATCC 27606           | 27.57 | 2.61    |
| <i>Clostridium pasteurianum</i>        | DSM 525              | 29.9  | 4.35    |
| <i>Clostridium perfringens</i>         | ATCC 13124           | 28.4  | 3.26    |
| <i>Clostridium sartagoforme</i>        | AAU1                 | 27.9  | 3.98    |
| <i>Clostridium sporogenes</i>          | ATCC 15579           | 28    | 4.1     |
| <i>Clostridium sporogenes</i>          | ATCC 19494           | 27.9  | 4.06    |
| <i>Clostridium sporogenes</i>          | DSM 795              | 28    | 4.14    |
| <i>Clostridium sulfidigenes</i>        | 113A c1              | 30    | 3.72    |
| <i>Clostridium tetani</i>              | E88                  | 28.8  | 2.87    |
| <i>Clostridium tunisiense</i>          | TJ C661              | 31.2  | 4.31    |
| <i>Clostridium tyrobutyricum</i>       | KCTC                 | 31.1  | 3.13    |
| <i>Clostridioides difficile</i>        | 630                  | 29.1  | 4.2     |
| <i>Paenibacillus lactis</i>            | 154                  | 51.8  | 6.8     |
| <i>Proteus mirabilis</i>               | HI4320               | 38.8  | 4.09    |
| <i>Paraclostridium bifermentans</i>    | ATCC 638             | 28.4  | 3.6     |
| <i>Clostridium amygdalinum</i>         | DPC 7176             | 40    | 5.3     |
| <i>Clostridium peptidovorans</i>       | DPC 7177             | 33    | 3.4     |
| <i>Clostridium aminovelericum</i>      | DPC 7173             | 35    | 4.4     |
| <i>Clostridium thiosulfatireducens</i> | DPC 7172             | 28.3  | 6.7     |
| <i>Clostridium cochlearium</i>         | DPC 7174             | 29.2  | 2.6     |
| <i>Clostridium tertium</i>             | DPC 7175             | 28.9  | 3.6     |
| <i>Salmonella enterica</i> LT2         | LT2                  | 52.2  | 4.95    |

2

3 **Table S1: Roary core genes of SRC phenotype**

| Gene          | Annotation                                                                                 | No. isolates |
|---------------|--------------------------------------------------------------------------------------------|--------------|
| <i>accB</i>   | Biotin carboxyl carrier protein of acetyl-CoA carboxylase                                  | 33           |
| <i>lon1</i>   | Lon protease 1                                                                             | 33           |
| <i>clpC</i>   | Negative regulator of genetic competence ClpC/MecB                                         | 33           |
| <i>mraY</i>   | Phospho-N-acetylmuramoyl-pentapeptide-transferase                                          | 33           |
| <i>rpe</i>    | Ribulose-phosphate 3-epimerase                                                             | 33           |
| <i>clpP</i>   | ATP-dependent Clp protease proteolytic subunit                                             | 33           |
| <i>fmt</i>    | Methionyl-tRNA formyltransferase                                                           | 33           |
| <i>pnp</i>    | Polyribonucleotide nucleotidyltransferase                                                  | 33           |
| <i>trmD</i>   | tRNA (guanine-N(1)-)-methyltransferase                                                     | 33           |
| <i>murB</i>   | UDP-N-acetylenolpyruvoylglucosamine reductase                                              | 33           |
| group_2420    | Radical SAM superfamily protein                                                            | 33           |
| <i>prkC</i>   | Serine/threonine-protein kinase PrkC                                                       | 33           |
| <i>mazG</i>   | Nucleoside triphosphate pyrophosphohydrolase                                               | 33           |
| <i>fabD</i>   | Malonyl CoA-acyl carrier protein transacylase                                              | 33           |
| <i>fabG_2</i> | 3-oxoacyl-[acyl-carrier-protein] reductase FabG                                            | 33           |
| <i>fabF</i>   | 3-oxoacyl-[acyl-carrier-protein] synthase 2                                                | 33           |
| <i>accC</i>   | Biotin carboxylase                                                                         | 33           |
| <i>uppS</i>   | Ditrans, polycis-undecaprenyl-diphosphate synthase ((2E,6E)-farnesyl-diphosphate specific) | 33           |
| <i>ispG</i>   | 4-hydroxy-3-methylbut-2-en-1-yl diphosphate synthase                                       | 33           |
| <i>uvrC</i>   | UvrABC system protein C                                                                    | 33           |
| <i>clpX</i>   | ATP-dependent Clp protease ATP-binding subunit ClpX                                        | 33           |
| <i>prfB</i>   | Peptide chain release factor 2                                                             | 33           |
| <i>rlmN</i>   | putative dual-specificity RNA methyltransferase RlmN                                       | 33           |
| <i>miaA</i>   | tRNA dimethylallyltransferase                                                              | 33           |
| <i>pgsA</i>   | CDP-diacylglycerol--glycerol-3-phosphate 3-phosphatidyltransferase                         | 33           |
| <i>rimO</i>   | Ribosomal protein S12 methylthiotransferase RimO                                           | 33           |
| group_2719    | dihydrolipoamide dehydrogenase                                                             | 33           |
| <i>dxr</i>    | 1-deoxy-D-xylulose 5-phosphate reductoisomerase                                            | 33           |
| group_2821    | glmZ(sRNA)-inactivating NTPase                                                             | 33           |
| <i>ispH</i>   | hypothetical protein                                                                       | 33           |
| <i>dxs_1</i>  | 1-deoxy-D-xylulose-5-phosphate synthase                                                    | 33           |
| group_2882    | hypothetical protein                                                                       | 33           |
| <i>yrrK</i>   | Putative Holliday junction resolvase                                                       | 33           |
| <i>dnaK_1</i> | Chaperone protein DnaK                                                                     | 33           |
| <i>rpsT</i>   | 30S ribosomal protein S20                                                                  | 33           |
| <i>gpmI</i>   | 2,3-bisphosphoglycerate-independent phosphoglycerate mutase                                | 33           |
| <i>topA</i>   | DNA topoisomerase 1                                                                        | 33           |
| <i>mnmG</i>   | tRNA uridine 5-carboxymethylaminomethyl modification enzyme MnmG                           | 33           |
| <i>rsmG</i>   | Ribosomal RNA small subunit methyltransferase G                                            | 33           |

|               |                                                                 |    |
|---------------|-----------------------------------------------------------------|----|
| <i>rsmH</i>   | Ribosomal RNA small subunit methyltransferase H                 | 33 |
| <i>engB</i>   | putative GTP-binding protein EngB                               | 33 |
| group_2983    | Nucleoid-associated protein                                     | 33 |
| <i>yvyD</i>   | Putative sigma-54 modulation protein                            | 33 |
| <i>tepA</i>   | Translocation-enhancing protein TepA                            | 33 |
| <i>mdeA</i>   | methionine gamma-lyase                                          | 33 |
| group_3095    | alanine racemase                                                | 33 |
| <i>rpsR</i>   | 30S ribosomal protein S18                                       | 33 |
| <i>hpt_2</i>  | Hypoxanthine-guanine phosphoribosyltransferase                  | 33 |
| <i>tpiA</i>   | Triosephosphate isomerase                                       | 33 |
| <i>rex</i>    | Redox-sensing transcriptional repressor Rex                     | 33 |
| <i>frr</i>    | Ribosome-recycling factor                                       | 33 |
| group_3184    | R3H domain protein                                              | 33 |
| <i>tig</i>    | Trigger factor                                                  | 33 |
| <i>recR</i>   | Recombination protein RecR                                      | 33 |
| <i>prfA</i>   | Peptide chain release factor 1                                  | 33 |
| <i>greA_1</i> | Transcription elongation factor GreA                            | 33 |
| <i>rpsP</i>   | 30S ribosomal protein S16                                       | 33 |
| <i>sigF_2</i> | RNA polymerase sigma-F factor                                   | 33 |
| <i>ssbB</i>   | Single-stranded DNA-binding protein SsbB                        | 33 |
| group_3473    | hypothetical protein                                            | 33 |
| <i>tsf</i>    | Elongation factor Ts                                            | 33 |
| <i>dnaA</i>   | Chromosomal replication initiator protein DnaA                  | 33 |
| <i>sigE</i>   | RNA polymerase sigma-E factor precursor                         | 33 |
| <i>pyrB</i>   | Aspartate carbamoyltransferase catalytic chain                  | 33 |
| <i>rpoB</i>   | DNA-directed RNA polymerase subunit beta                        | 33 |
| group_3678    | hypothetical protein                                            | 33 |
| <i>rpsO</i>   | 30S ribosomal protein S15                                       | 33 |
| <i>ffh</i>    | Signal recognition particle protein                             | 33 |
| <i>lepA</i>   | Elongation factor 4                                             | 33 |
| <i>fabZ</i>   | 3-hydroxyacyl-[acyl-carrier-protein] dehydratase FabZ           | 33 |
| <i>rpmF</i>   | 50S ribosomal protein L32                                       | 33 |
| <i>sigF_1</i> | RNA polymerase sigma-F factor                                   | 33 |
| <i>rplK</i>   | 50S ribosomal protein L11                                       | 33 |
| group_4134    | hypothetical protein                                            | 33 |
| <i>glyQS</i>  | Glycine--tRNA ligase                                            | 33 |
| group_4434    | hypothetical protein                                            | 33 |
| group_4475    | hypothetical protein                                            | 33 |
| <i>rpmB</i>   | 50S ribosomal protein L28                                       | 33 |
| <i>def</i>    | Peptide deformylase                                             | 33 |
| <i>ftsH_2</i> | ATP-dependent zinc metalloprotease FtsH                         | 33 |
| <i>accD</i>   | Acetyl-coenzyme A carboxylase carboxyl transferase subunit beta | 33 |

4

5

A

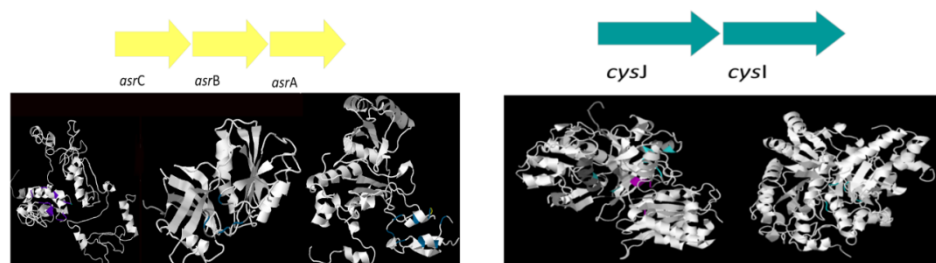

B

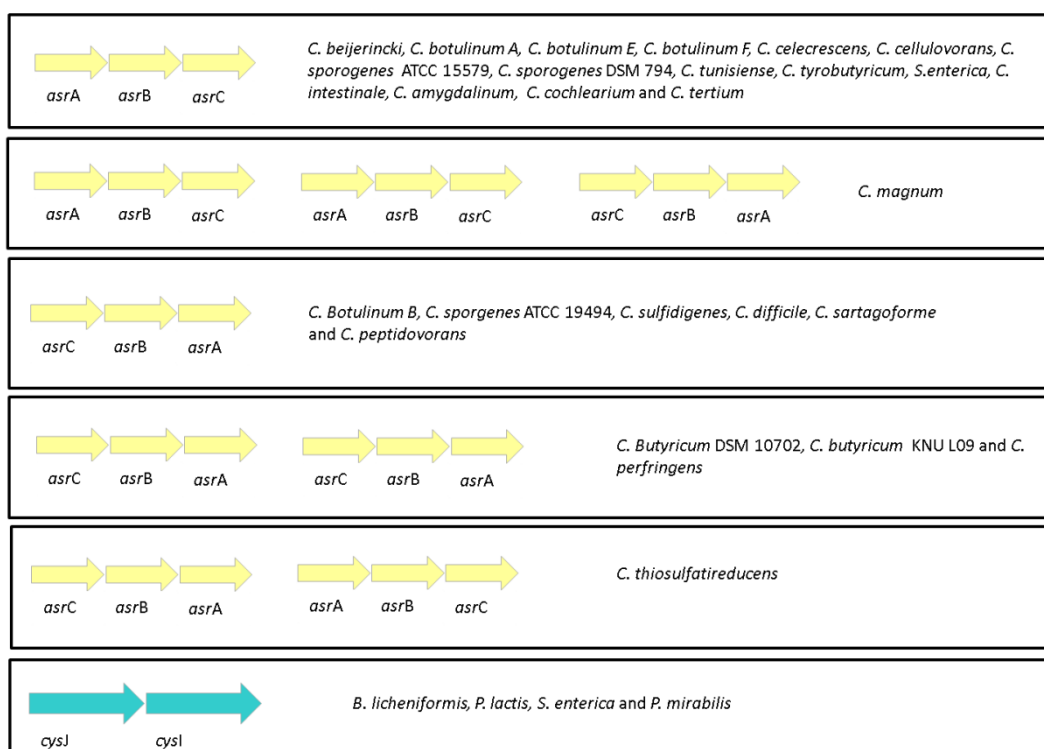

7

8

9

10

11

**Fig.S1: (A) *asrABC* and *cysJI* sulphite reducing operons, with tertiary structures of proteins, (B) annotated complete sulphite reducing gene clusters in SRBs**

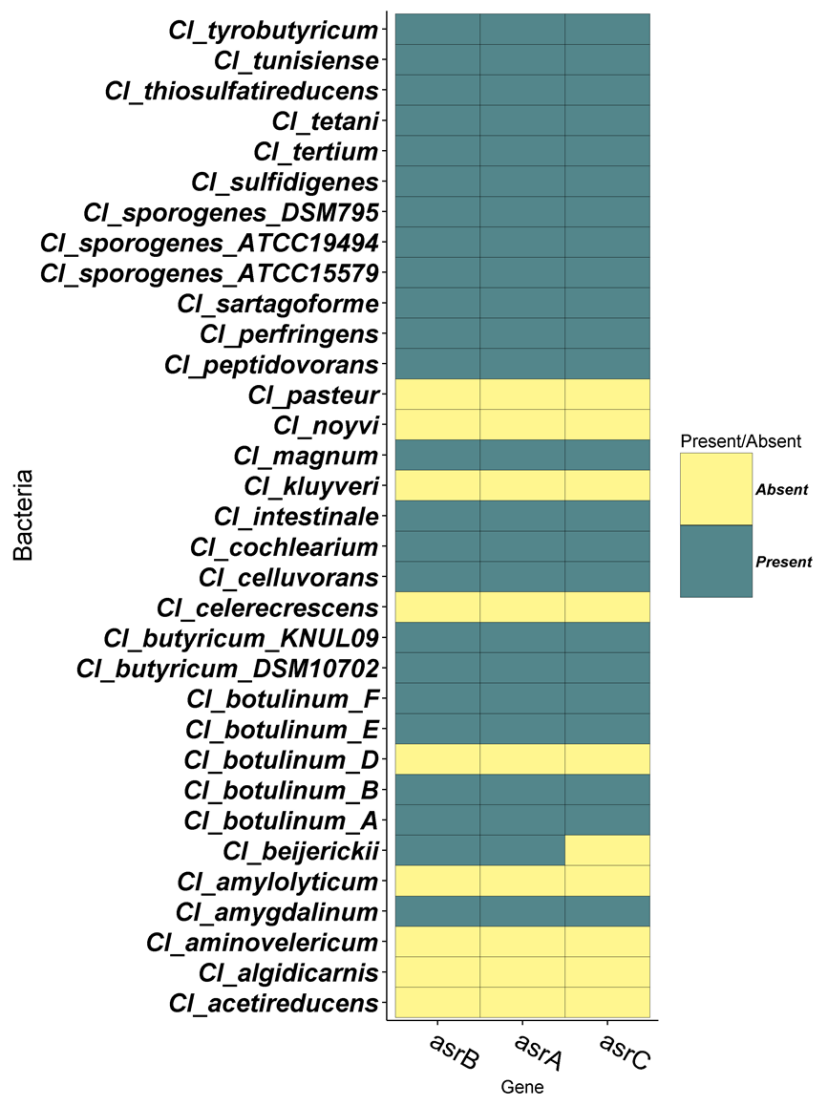

Fig.S2: Roary results for sulphite reducing genes

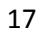

6

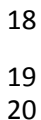

7



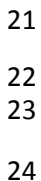

8



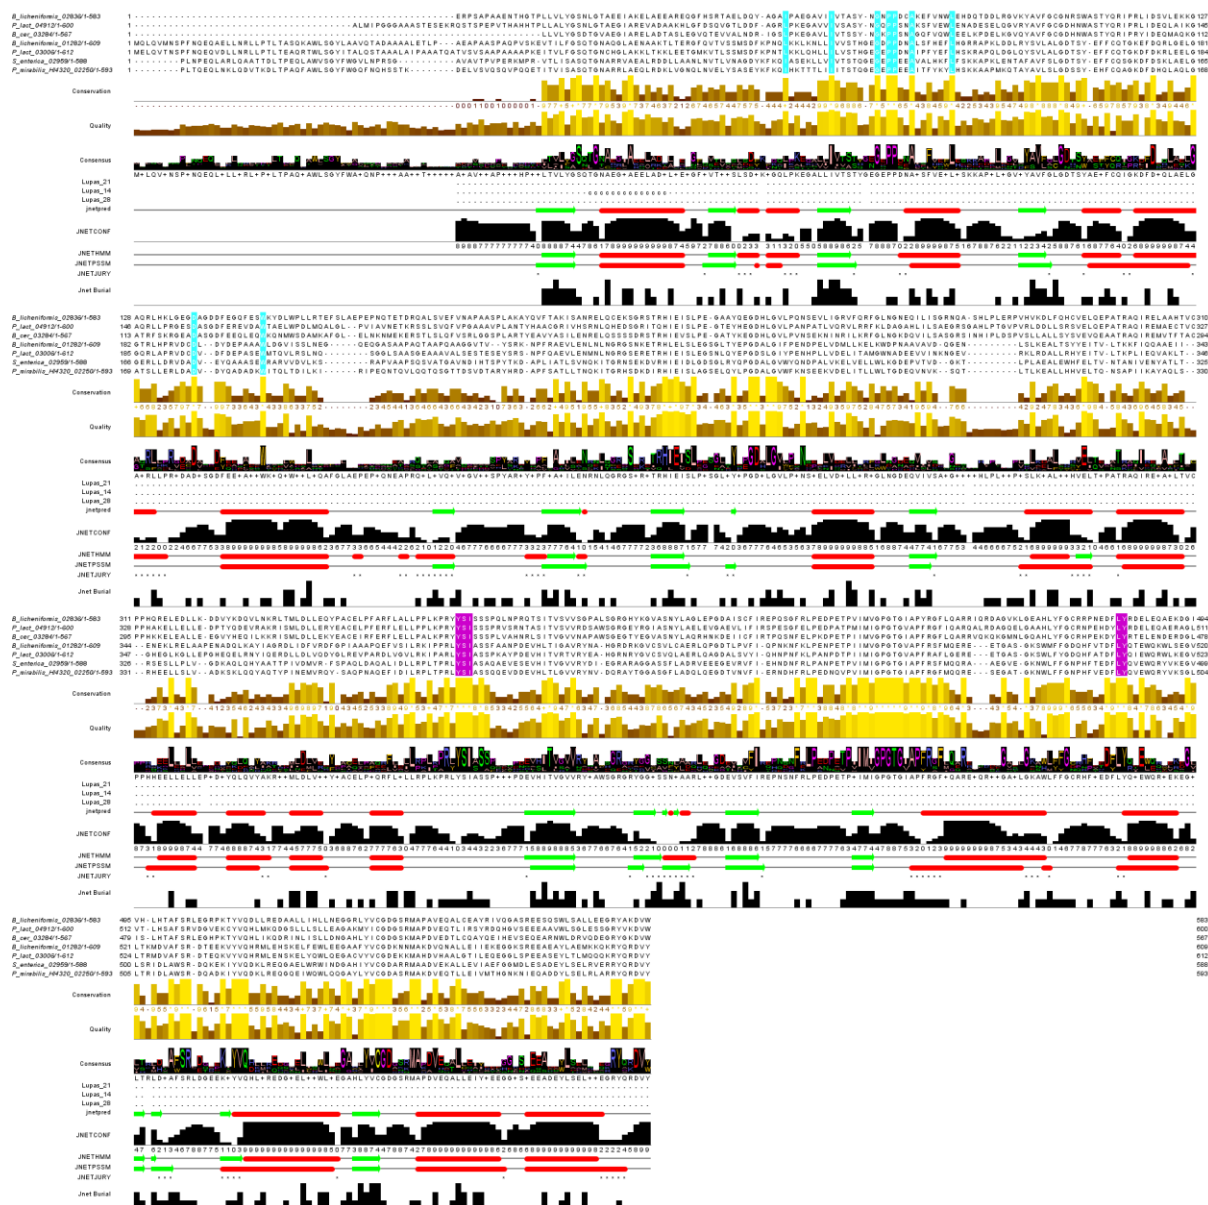

25

26

27

**Fig.S6: Jalview alignment of *cysJ* gene based on blastp results; conserved amino acids in the mononucleotide binding domains, highlighted in the light blue**

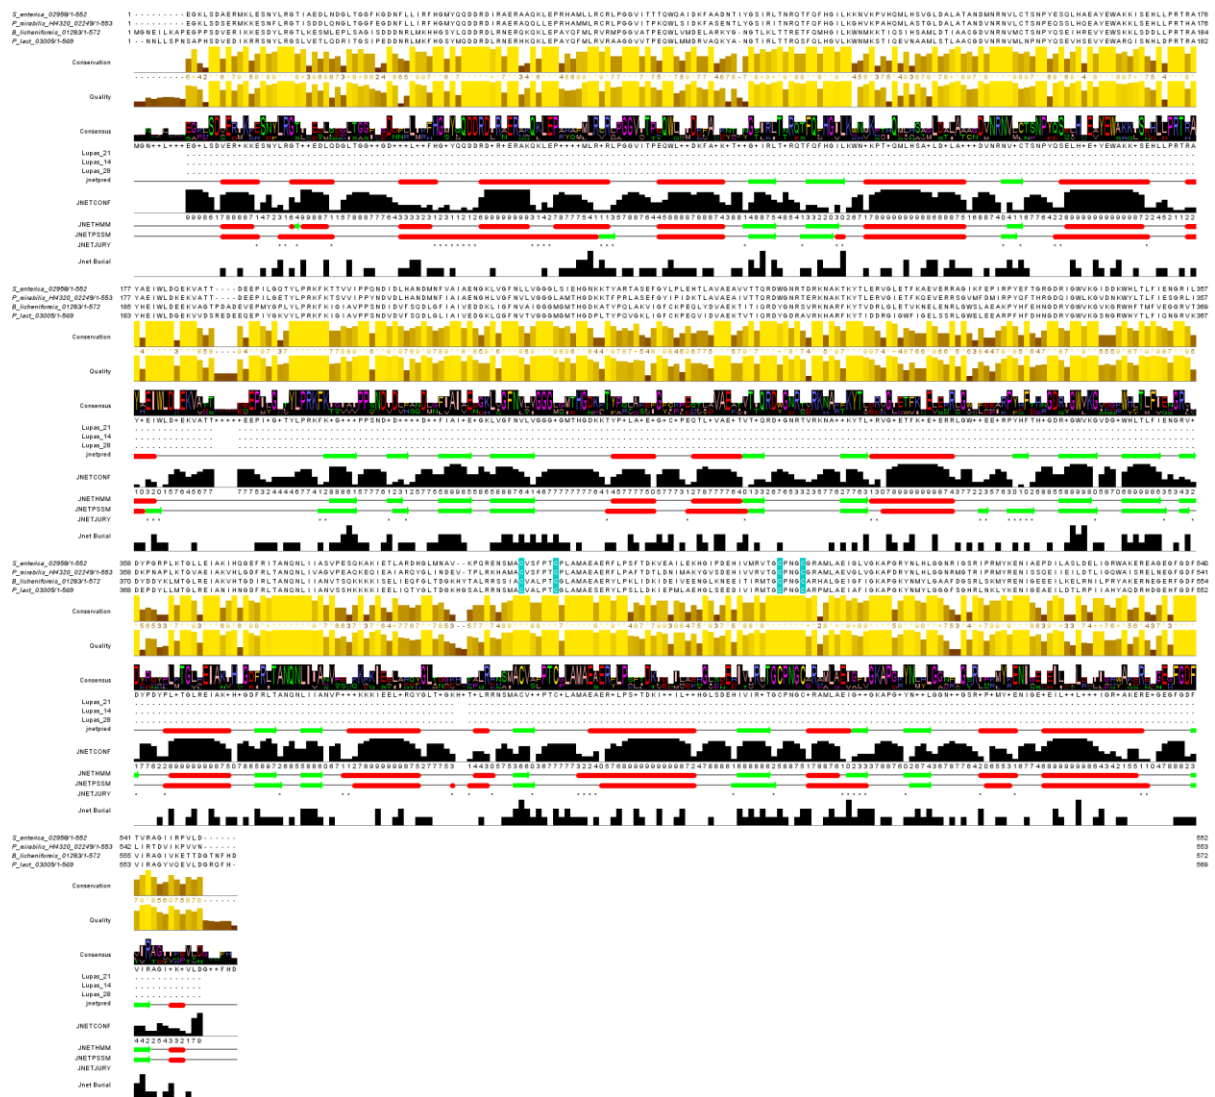

Fig.S7: Jalview alignment of *cysI* gene based on blastp results; conserved cysteine residues in this amino acid sequence are highlighted
